# Supplementary material for: Pharmacophore Modeling and 3D-QSAR Study of Indole and Isatin Derivatives as Antiamyloidogenic Agents Targeting Alzheimer’s Disease
Source: PubMed Central journal article supplement (PMC7731220; doi:10.3390/molecules25235773), 2020-12-07
Supplement: molecules-25-05773-s001.pdf [file molecules-25-05773-s001.pdf]

| Code | Structure | SMILES                                                                                     | % inhib. @ 100 $\mu$ M | IC <sub>50</sub> ( $\mu$ M) | ref. | core structure |
|------|-----------|--------------------------------------------------------------------------------------------|------------------------|-----------------------------|------|----------------|
| S1   |           | <chem>O=C(C1=CC=CC=C1C(=O)C2=CC=CC=C2)/N=C(C1=CC=CC=C1)C(=O)C2=CC=CC=C2</chem>             | 49±2.0                 |                             | 15   | Indandione     |
| S2   |           | <chem>O=C(C1=CC=CC=C1C(=O)C2=CC=CC=C2)/N=C(C1=CC=C(C)C=C1)C(=O)C2=CC=CC=C2</chem>          | 44±4.0                 |                             | 15   |                |
| S3   |           | <chem>O=C(C1=CC=CC=C1C(=O)C2=CC=CC=C2)/N=C(C1=CC=C(C(C)C)C=C1)C(=O)C2=CC=CC=C2</chem>      |                        | 18                          | 15   |                |
| S4   |           | <chem>O=C(C1=CC=CC=C1C(=O)C2=CC=CC=C2)/N=C(C1=CC=C(Cl)C=C1)C(=O)C2=CC=CC=C2</chem>         |                        | 32                          | 15   |                |
| S5   |           | <chem>O=C(C1=CC=CC=C1C(=O)C2=CC=CC=C2)/N=C(C1=CC=C(Cl)C=C1)C(=O)C2=CC=CC=C2</chem>         |                        | 18                          | 15   |                |
| S6   |           | <chem>O=C(C1=CC=CC=C1C(=O)C2=CC=CC=C2)/N=C(C1=CC=C(Cl)C=C1)C(=O)C2=CC=CC=C2</chem>         |                        | 23                          | 15   |                |
| S7   |           | <chem>O=C(C1=CC=CC=C1C(=O)C2=CC=CC=C2)/N=C(C1=CC=C(Cl)C=C1)C(=O)C2=CC=CC=C2</chem>         | 38±5.3                 |                             | 15   |                |
| S8   |           | <chem>O=C1C(=O)C=NC2=CC=CC=C2N1C(=O)C3=CC=CC=C3</chem>                                     |                        | 8,8                         | 15   | 3-indolinone   |
| S9   |           | <chem>O=C1C(=O)C=NC2=CC=C(C)C=C2N1C(=O)C3=CC=CC=C3</chem>                                  |                        | 3,6                         | 15   |                |
| S10  |           | <chem>O=C1C(=O)C=NC2=CC=C(C(C)C)C=C2N1C(=O)C3=CC=CC=C3</chem>                              |                        | 1,4                         | 15   |                |
| S11  |           | <chem>O=C1C(=O)C=NC2=CC=C(Cl)C=C2N1C(=O)C3=CC=CC=C3</chem>                                 |                        | 13                          | 15   |                |
| S12  |           | <chem>O=C1C(=O)C=NC2=CC=C(Cl)C=C2N1C(=O)C3=CC=CC=C3</chem>                                 |                        | 2,5                         | 15   |                |
| S13  |           | <chem>O=C1C(=O)C=NC2=CC=C(Cl)C=C2N1C(=O)C3=CC=CC=C3</chem>                                 | 33±1.0                 |                             | 15   |                |
| S14  |           | <chem>O=C1C(=O)C=NC2=CC=C(C2)N1C(=O)C3=CC=C(Br)C=C3</chem>                                 |                        | 35                          | 15   |                |
| S15  |           | <chem>O=C1C(=O)C=NC2=CC=C(C2)N1C(=O)C3=CC=C(Br)C=C3</chem>                                 |                        | 51                          | 15   |                |
| S16  |           | <chem>O=C1C(=O)C=NC2=CC=C(C(C)C)C=C2N1C(=O)C3=CC=C(Br)C=C3</chem>                          |                        | 23                          | 15   |                |
| S17  |           | <chem>O=C1C(=O)C=NC2=CC=C(Cl)C=C2N1C(=O)C3=CC=C(Br)C=C3</chem>                             |                        | 7,8                         | 15   |                |
| S18  |           | <chem>O=C1C(=O)C=NC2=CC=C(Cl)C=C2N1C(=O)C3=CC=C(Br)C=C3</chem>                             |                        | 4,4                         | 15   |                |
| S19  |           | <chem>O=C1C(=O)C=NC2=CC=C(Cl)C=C2N1C(=O)C3=CC=C(Br)C=C3</chem>                             | 46±7.0                 |                             | 15   |                |
| S20  |           | <chem>O=C1C(=O)C=NC2=CC=C(Cl)C=C2N1C(=O)C3=CC=C(Br)C=C3</chem>                             | 23±2.3                 |                             | 15   |                |
| S21  |           | <chem>O=C1NC2=CC=CC=C2C1=O/N=C(C1=CC=C(OC)C=C1)C(=O)C2=CC=CC=C2</chem>                     |                        | 13                          | 16   |                |
| S22  |           | <chem>O=C1NC2=CC=C([N+])([O-])C=C2C1=O/N=C(C1=CC=C([N+])([O-])C=C1)C(=O)C2=CC=CC=C2</chem> | -2±7                   |                             | 16   |                |

|     |  |                                                       |                        |      |    |
|-----|--|-------------------------------------------------------|------------------------|------|----|
| S23 |  | O=C1NC2=CC=C(OC)C=C2/C1=N/NC3=CC=CC=C3                | 52±8                   |      | 16 |
| S24 |  | O=C1NC2=CC(OC)=CC=C2/C1=N/NC3=CC=CC=C3                |                        | 5,8  | 16 |
| S25 |  | O=C1NC2=CC(OC)=C(OC)C=C2/C1=N/NC3=CC=CC=C3            |                        | 63   | 16 |
| S26 |  | O=C1NC2=CC=C(OC)C=C2/C1=N/NC3=CC(Cl)=CC=C3            | 72±1                   |      | 16 |
| S27 |  | O=C1NC2=CC=C(OC)C=C2/C1=N/NC3=CC=C(Cl)C=C3            | 43±2                   |      | 16 |
| S28 |  | O=C1NC2=CC=C(OC)C=C2/C1=N/NC3=CC=C(C)C=C3             | 29±4                   |      | 16 |
| S29 |  | O=C1NC2=CC=C(OC)C=C2/C1=N/NC3=CC=C(C(C)C)C=C3         |                        | 0,43 | 16 |
| S30 |  | O=C1NC2=CC=C(OC)C=C2/C1=N/NC3=CC=C(C(C)(C)C)C=C3      | 66±4                   | 15   | 16 |
| S31 |  | O=C1NC2=CC=CC=C2/C1=N/NC3=CC=CC=C3                    | (I) 36±2.2 (II) 61±0.7 |      | 16 |
| S32 |  | O=C1NC2=CC=C(OC)C=C2/C1=N/NC3=CC(C(C)(C)C)C=C3        | 56±2                   |      | 16 |
| S33 |  | O=C1NC2=CC=C(OC)C=C2/C1=N/NC3=CC=C(OC)C=C3            |                        | 3,7  | 16 |
| S34 |  | O=C1NC2=CC=C(OC)C=C2/C1=N/NC3=CC=C(OCC4=CC=CC=C4)C=C3 | 20±1                   |      | 16 |
| S35 |  | O=C1NC2=CC=C(OC)C=C2/C1=N/NC3=CC=C(OCC4=CC=CC=C4)C=C3 | 44±4 (I)               |      | 16 |
| S36 |  | O=C1NC2=CC(OC)=CC=C2/C1=N/NC3=CC=C(C(C)C)C=C3         |                        | 7,1  | 16 |
| S37 |  | O=C1NC2=CC(OC)=C(OC)C=C2/C1=N/NC3=CC(Cl)=CC=C3        | 70±3                   |      | 16 |
| S38 |  | O=C1NC2=CC(OC)=C(OC)C=C2/C1=N/NC3=CC(Cl)=CC=C3        |                        | 17   | 16 |
| S39 |  | O=C1NC2=CC(OC)=C(OC)C=C2/C1=N/NC3=CC=C(Cl)C=C3        |                        | 33   | 16 |
| S40 |  | O=C1NC2=CC(OC)=C(OC)C=C2/C1=N/NC3=CC=C(C(C)C)C=C3     |                        | 4,4  | 16 |
| S41 |  | O=C1NC2=CC(OC)=C(OC)C=C2/C1=N/NC3=CC=C(OC)C=C3        |                        | 22   | 16 |
| S42 |  | O=C1NC2=CC=CC=C2/C1=N/NC3=CC(F)=CC=C3                 | 52±0.9                 |      | 16 |
| S43 |  | O=C1NC2=CC(Cl)=C(F)C=C2/C1=N/NC3=CC=C(Cl)C=C3         | 28±3.7                 |      | 16 |
| S44 |  | O=C1NC2=CC=C(Br)C=C2/C1=N/NC3=CC=C(Cl)C=C3            | 63±4                   |      | 16 |

|     |  |                                                                    |        |     |       |
|-----|--|--------------------------------------------------------------------|--------|-----|-------|
| S45 |  | <chem>O=C1NC2=CC=C([N+](=[O-])=O)C=C2/C1=N/NC3=CC=C(Cl)C=C3</chem> | 12±2   |     | 16    |
| S46 |  | <chem>O=C1NC2=CC=CC=C2/C1=N/NC3=CC=C(O)C=C3</chem>                 |        | 9,3 | 16    |
| S47 |  | <chem>O=C1NC2=CC=C(O)C=C2/C1=N/NC3=CC=CC=C3</chem>                 | 62±3   |     | 16    |
| S48 |  | <chem>O=C1NC2=CC=C(O)C=C2/C1=N/NC3=CC(Cl)=CC=C3</chem>             |        | 18  | 16    |
| S49 |  | <chem>O=C1NC2=CC=C(O)C=C2/C1=N/NC3=CC=C(C(C)C)C=C3</chem>          |        | 21  | 16    |
| S50 |  | <chem>O=C1NC2=CC=C(O)C=C2/C1=N/NC3=CC=C(O)C=C3</chem>              | 61±2   |     | 16    |
| S51 |  | <chem>O=C1NC2=CC(O)=CC=C2/C1=N/NC3=CC=CC=C3</chem>                 |        | 22  | 16    |
| S52 |  | <chem>O=C1NC2=CC(O)=CC=C2/C1=N/NC3=CC=C(C(C)C)C=C3</chem>          |        | 6   | 16    |
| S53 |  | <chem>O=C1NC2=CC=CC=C2/C1=N/NC3=C(Cl)C=CC=C3</chem>                | 44±5   |     | 16    |
| S54 |  | <chem>O=C1NC2=CC(O)=C(O)C=C2/C1=N/NC3=CC=CC=C3</chem>              |        | 4,3 | 16    |
| S55 |  | <chem>O=C1NC2=CC(O)=C(O)C=C2/C1=N/NC3=C(Cl)C=CC=C3</chem>          |        | 11  | 16    |
| S56 |  | <chem>O=C1NC2=CC(O)=C(O)C=C2/C1=N/NC3=CC(Cl)=CC=C3</chem>          |        | 1,1 | 16,18 |
| S57 |  | <chem>O=C1NC2=CC(O)=C(O)C=C2/C1=N/NC3=CC=C(Cl)C=C3</chem>          |        | 17  | 16    |
| S58 |  | <chem>O=C1NC2=CC(O)=C(O)C=C2/C1=N/NC3=CC=C(C(C)C)C=C3</chem>       |        | 1,6 | 16    |
| S59 |  | <chem>O=C1NC2=CC(O)=C(O)C=C2/C1=N/NC3=CC=C(O)C=C3</chem>           |        | 24  | 16    |
| S60 |  | <chem>O=C1NC2=CC=CC=C2/C1=N/NC3=CC(Cl)=CC=C3</chem>                | 39±5   |     | 16    |
| S61 |  | <chem>O=C1NC2=CC=CC=C2/C1=N/NC3=CC=C(Cl)C=C3</chem>                | 24±4.9 |     | 16    |
| S62 |  | <chem>O=C1NC2=CC=CC=C2/C1=N/NC3=CC=C(OC(F)(F)F)C=C3</chem>         | 57±3   |     | 16    |
| S63 |  | <chem>O=C1NC2=CC=CC=C2/C1=N/NC3=CC([N+](=[O-])=O)=CC=C3</chem>     | 29±1.2 |     | 16    |
| S64 |  | <chem>O=C1NC2=CC=CC=C2/C1=N/NC3=CC=C(C(C)C)C=C3</chem>             | 64±4   |     | 16    |

Isatin 3-hydrazones

|     |  |                                                                           |                |      |    |
|-----|--|---------------------------------------------------------------------------|----------------|------|----|
| S65 |  | <chem>O=C1NC2=CC=C(OC)C=C2/C1=N/NC3=C(N=CC=C4)C4=CC=C3</chem>             | 58 ± 4 (SD)    |      | 19 |
| S66 |  | <chem>O=C1NC2=CC=C(OC)C=C2/C1=N/NC3=C(C=CC(Cl)=C4)C4=NC=C3</chem>         | 14 ± 12,5 (SD) |      | 19 |
| S67 |  | <chem>O=C1NC2=CC=C(OC)C=C2/C1=N/NC3=NC(CCl)=CS3</chem>                    |                | 13   | 19 |
| S68 |  | <chem>O=C1NC2=CC=C(OC)C=C2/C1=N/NC3=NC(C)=C(C)S3</chem>                   | 43 ± 1.0 (SD)  |      | 19 |
| S69 |  | <chem>O=C1NC2=CC=C(OC)C=C2/C1=N/NC3=NC(C4=CC=CC=C4)=CS3</chem>            |                | 1,21 | 19 |
| S70 |  | <chem>O=C1NC2=CC=C(OC)C=C2/C1=N/NC3=NC(C4=CC(O)=CC=C4)=CS3</chem>         |                | 16   | 19 |
| S71 |  | <chem>O=C1NC2=CC=C(OC)C=C2/C1=N/NC3=NC(C4=CC(OC)=CC=C4)=CS3</chem>        |                | 34   | 19 |
| S72 |  | <chem>O=C1NC2=CC=C(OC)C=C2/C1=N/NC3=NC(C4=CC(Br)=CC=C4)=CS3</chem>        |                | 40   | 19 |
| S73 |  | <chem>O=C1N(C)C2=CC=C(OC)C=C2/C1=N/NC3=CC=C(C(C)C)C=C3</chem>             |                | 11   | 19 |
| S74 |  | <chem>O=C1N(C)C2=CC=C(OC)C=C2/C1=N/NC3=CC=C(C(C)C)C=C3</chem>             |                | 0,81 | 19 |
| S75 |  | <chem>O=C1N(C2CC2)C3=CC=C(OC)C=C3/C1=N/NC4=CC=C(C(C)C)C=C4</chem>         |                | 0,8  | 19 |
| S76 |  | <chem>O=C1N(CC2=CC=CC=C2)C3=CC=C(OC)C=C3/C1=N/NC4=CC=C(C(C)C)C=C4</chem>  |                | 0,53 | 19 |
| S77 |  | <chem>O=C1N(CCC2=CC=CC=C2)C3=CC=C(OC)C=C3/C1=N/NC4=CC=C(C(C)C)C=C4</chem> |                | 0,61 | 19 |
| S78 |  | <chem>O=C1N(CCC2=CC=CC=C2)C3=CC=C(OC)C=C3/C1=N/NC4=CC=C(C(C)C)C=C4</chem> |                | 0,83 | 19 |

|     |  |                                                                         |                |     |    |
|-----|--|-------------------------------------------------------------------------|----------------|-----|----|
| S79 |  | <chem>O=C1NC2=CC=C(CCCC)C=C2/C1=N/NC3=CC=C(C(C)C)C=C3</chem>            | 55±0.9 (SD)    |     | 19 |
| S80 |  | <chem>O=C1NC2=C(Br)C=CC=C2/C1=N/NC3=CC=C(C(C)C)C=C3</chem>              | 1±9.3 (SD)     |     | 19 |
| S81 |  | <chem>O=C1NC2=CC=C(S([O-])(=O)=O)C=C2/C1=N/NC3=CC=C(C(C)C)C=C3</chem>   | 35±4.1 (SD)    |     | 19 |
| S82 |  | <chem>O=C1NC2=CC3=C(OCO3)C=C2/C1=N/NC4=CC=C(C(C)C)C=C4</chem>           | 70±2.9 (SD)    |     | 19 |
| S83 |  | <chem>O=C1NC2=CC=C(OC)C=C2/C1=N/NC3=CC=C(C#N)C=C3</chem>                | 16±3.0 (SD)    |     | 19 |
| S84 |  | <chem>O=C1NC2=CC=C(OC)C=C2/C1=N/NC3=CC=C(C(F)(F)F)C=C3</chem>           | 57±9.0 (SD)    |     | 19 |
| S85 |  | <chem>O=C1NC2=CC=C(OC)C=C2/C1=N/NC3=CC(C(F)(F)F)=CC(C(F)(F)F)=C3</chem> |                | 9,9 | 19 |
| S86 |  | <chem>O=C1NC2=CC=C(OC)C=C2/C1=N/NC3=NC=CC=C3</chem>                     |                | 90  | 19 |
| S87 |  | <chem>O=C1NC2=CC=C(OC)C=C2/C1=N/NC3=C(C=CC=C4)C4=CC=C3</chem>           |                | 28  | 19 |
| S88 |  | <chem>O=C1NC2=CC=C(OC)C=C2/C1=N/NC3=NC(C=CC=C4)=C4C=C3</chem>           | 67% ± 3,8 (SD) |     | 19 |
| S89 |  | <chem>O=C1NC2=CC=C(OC)C=C2/C1=N/N=C/C3=CC=C(C(C)C)C=C3</chem>           |                | 6,7 | 19 |
| S90 |  | <chem>O=C1NC2=CC=C(OC)C=C2/C1=N/N=C/C3=CC(Cl)=CC=C3</chem>              |                | 11  | 19 |
| S91 |  | <chem>O=C1NC2=CC=C(OC)C=C2/C1=N/NC3=CC(Cl)=CC=C3=O</chem>               | 31±2.9 (SD)    |     | 19 |
| S92 |  | <chem>OC1=CC=C(NC=C2/C=N/NC3=C(C=C(Cl)C=C3)C2=C1</chem>                 |                | 21  | 15 |
| S93 |  | <chem>COC1=CC=C(NC=C2/C=N/NC3=CC=C(C(C)C)C=C3)C2=C1</chem>              |                | 41  | 19 |

Other
